# Supplementary material for: Chronic Release of Tailless Phage Particles from Lactococcus lactis
Source: PubMed Central journal article supplement (PMC8752148; doi:10.1128/aem.01483-21), 2022-01-11
Supplement: aem.01483-21-s0001.pdf [file aem.01483-21-s0001.pdf]

1 **Supplementary materials**

2

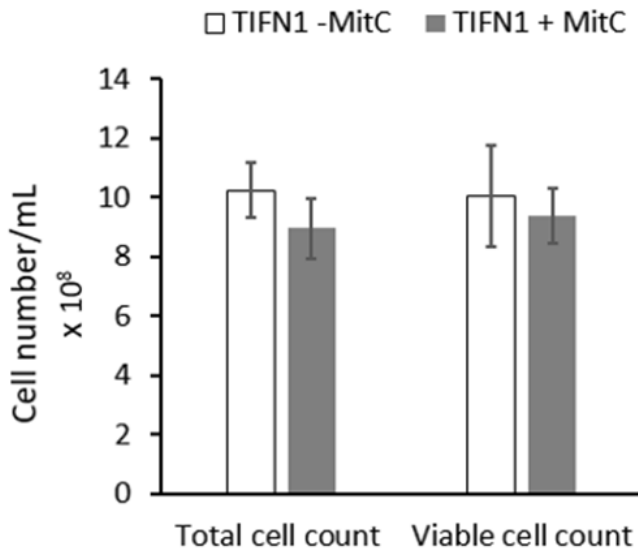

3

4 **Figure S1. Cell count of *Lactococcus lactis* strain TIFN1 under phage induction conditions.** Total cell count  
5 (obtained by counting cells using a haemocytometer) and viable cell count (determined by plating and colony  
6 count) in TIFN1 cultures induced with MitC at 7 hours and control cultures without induction.

7

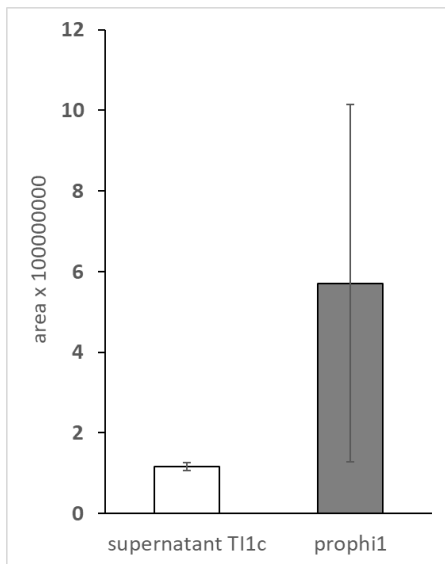

8

9 **Figure S2. Lipid (sum of phosphatidyl glycerol and cardiolipin) signal detected in culture supernatant of**  
10 **phage-free control T11c and prophi1 collected from culture supernatant of TIFN1.**

11

12

13
